# Supplementary material
Source: HighWire-hosted journal article supplement (https://adc.bmj.com/content/104/5/419)
Supplement: inline-supplementary-material-1 [file inline-supplementary-material-1.pdf]

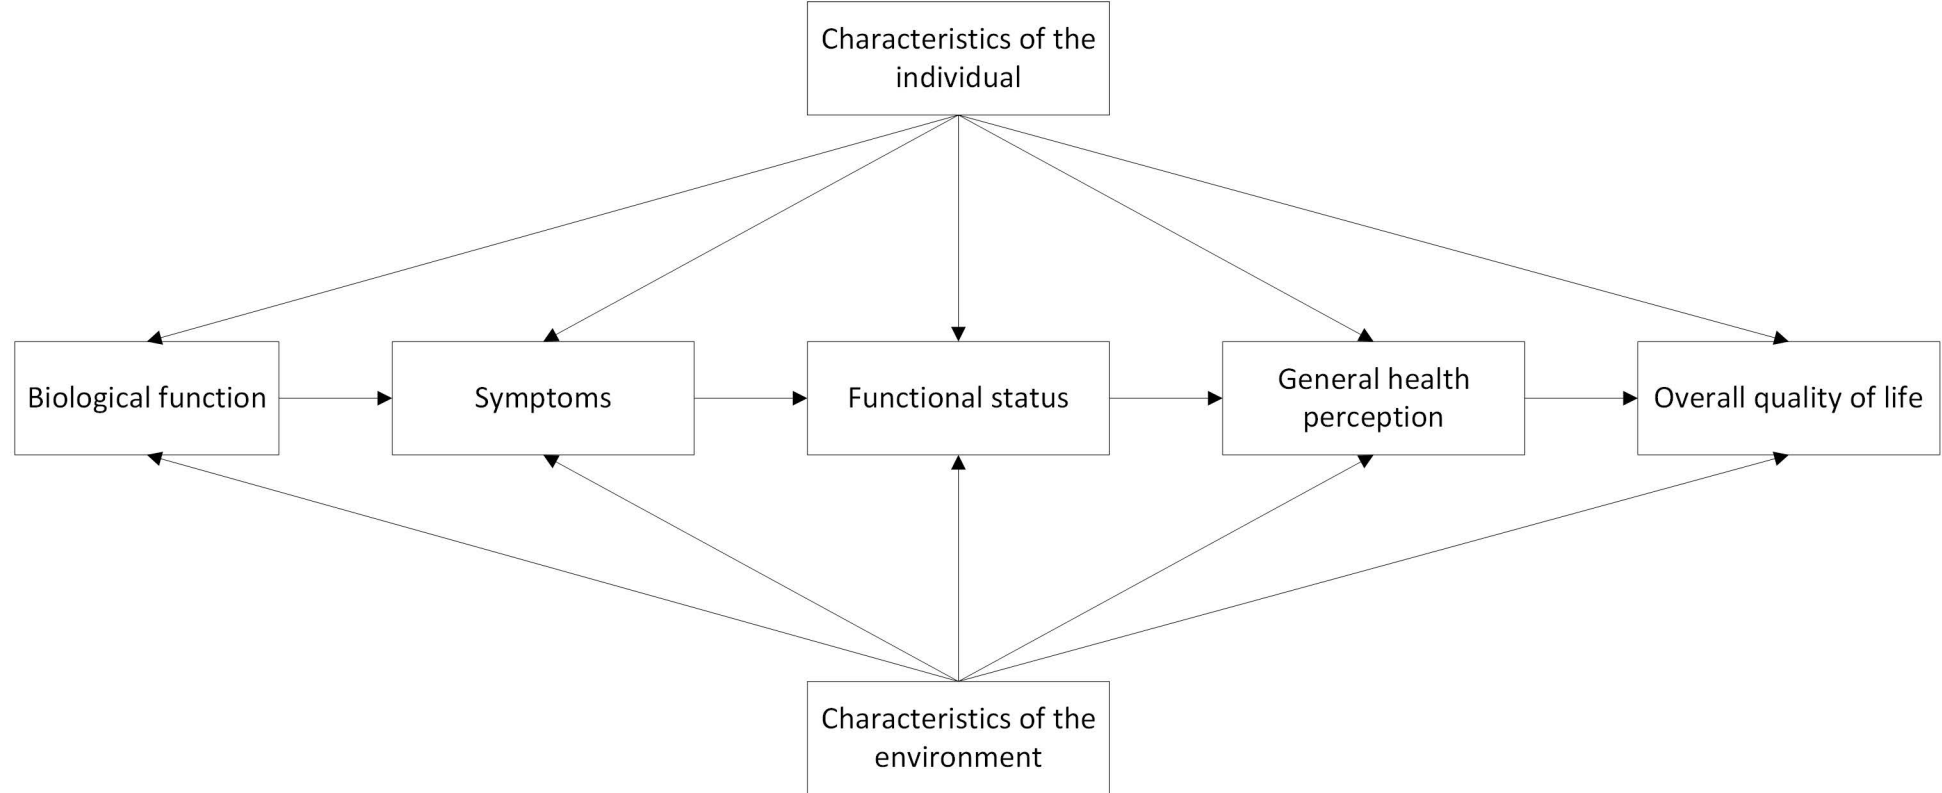

**Supplementary Figure 1.** Revised Wilson and Cleary model for health related quality of life.<sup>14</sup>
