# Supplementary material
Source: HighWire-hosted journal article supplement (https://adc.bmj.com/content/104/5/419)
Supplement: inline-supplementary-material-3 [file inline-supplementary-material-3.pdf]

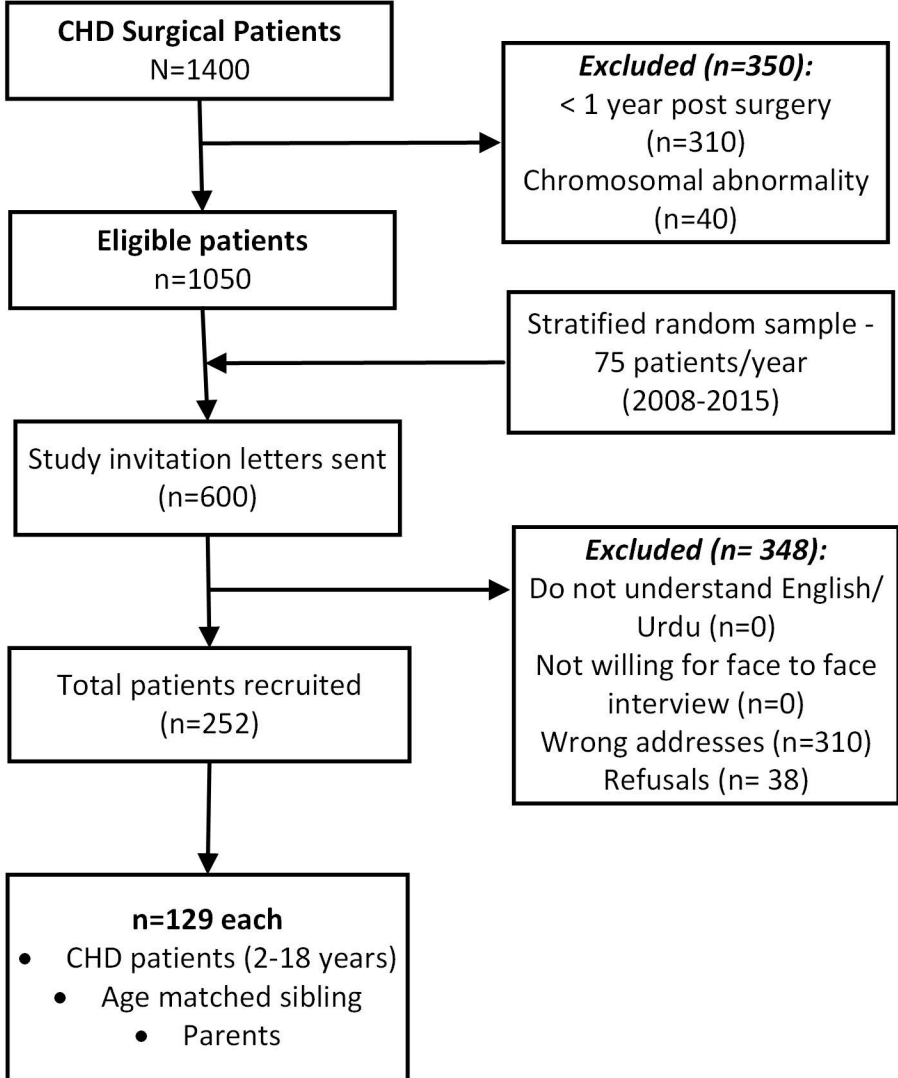

**Supplementary Figure 2** - Study patients recruitment flow diagram – Health related quality of life in congenital heart disease surgery patients in Pakistan
